# Implementation of data access and use procedures in clinical data warehouses. A systematic review of literature and publicly available policies

Elena Pavlenko<sup>1,2,3</sup>, Daniel Strech<sup>1,2,3</sup>, Holger Langhof<sup>1,2,3\*</sup>

<sup>1</sup>Charité – Universitätsmedizin Berlin, corporate member of Freie Universität Berlin, Humboldt-Universität zu Berlin, and Berlin Institute of Health

<sup>2</sup>QUEST – Center for Transforming Biomedical Research, Berlin Institute of Health (BIH), 10178 Berlin, Germany

<sup>3</sup>Institute for History, Ethics and Philosophy of Medicine, Hannover Medical School (MHH), Hannover, Germany

## \*Corresponding author

Holger Langhof

QUEST – Center for Transforming Biomedical Research

Charité – University Medicine, Berlin Institute of Health (BIH)

Anna-Louisa-Karsch-Str. 2

10178 Berlin, Germany

Phone: +49 30 450 543 669

[holger.langhof@alumni.charite.de](mailto:holger.langhof@alumni.charite.de)

Key words: clinical data warehouse; data access and use; data sharing; ethics; governance

## 1 **Abstract**

## 2 **Background**

3 The promises of improved health care and health research through data-intensive applications  
4 rely on a growing amount of health data. At the core of large-scale data integration efforts, clinical  
5 data warehouses (CDW) are also responsible of data governance, managing data access and  
6 (re)use. As the complexity of the data flow increases, greater transparency and standardization of  
7 criteria and procedures is required in order to maintain objective oversight and control. This study  
8 assessed the spectrum of data access and use criteria and procedures in clinical data warehouses  
9 governance internationally.

## 10 **Methods**

11 We performed a systematic review of (a) the published scientific literature on CDW and (b) publicly  
12 available information on CDW data access, e.g., data access policies. A qualitative thematic  
13 analysis was applied to all included literature and policies.

## 14 **Results**

15 Twenty-three scientific publications and one policy document were included in the final analysis.  
16 The qualitative analysis led to a final set of three main thematic categories: (1) requirements,  
17 including recipient requirements, reuse requirements, and formal requirements; (2) structures and  
18 processes, including review bodies and review values; and (3) access, including access  
19 limitations.

## 20 **Conclusions**

21 The description of data access and use governance in the scientific literature is characterized by  
22 a high level of heterogeneity and ambiguity. In practice, this might limit the effective data sharing

23 needed to fulfil the high expectations of data-intensive approaches in medical research and health  
24 care. The lack of publicly available information on access policies conflicts with ethical  
25 requirements linked to principles of transparency and accountability.

26 CDW should publicly disclose by whom and under which conditions data can be accessed, and  
27 provide designated governance structures and policies to increase transparency on data access.  
28 The results of this review may contribute to the development of practice-oriented minimal  
29 standards for the governance of data access, which could also result in a stronger harmonization,  
30 efficiency, and effectiveness of CDW.

## 31 **BACKGROUND**

32 Digitalization in health care and biomedical research has developed at a rapid pace. What  
33 previously consisted of error-prone and time-consuming manual documentation of information,  
34 often resulting in poorly structured data, has in large part been replaced by digitally supported or  
35 fully automatized processes. Despite persistent challenges, the widespread adoption of electronic  
36 health records (EHR) is one of many examples of this digital progress (1), adding to an ever-  
37 increasing amount of personal clinical data generated in routine health care delivery.

38 High potential is expected from the reuse of such structured clinical data for secondary research  
39 purposes, for example when applied in epidemiological and health economic research,  
40 comparative effectiveness research, or health care quality improvement (2-4). The establishment  
41 of learning health care systems (LHCS) and the development of precision medicine are further  
42 examples of promising developments (5, 6). Given an appropriate level of data quality, data-  
43 intensive research using big data analytics, machine learning, deep learning and artificial  
44 intelligence could become game changers in biomedical research and health care delivery (7).

45 One of the cornerstones of successful data reuse is an appropriate data infrastructure. However,  
46 due to differences in local, regional and national infrastructures, the information system landscape  
47 in the health care sector is largely characterized by heterogeneity (8). Hospitals alone, for  
48 instance, require a broad spectrum of different IT solutions, such as electronic medical records,  
49 laboratory information systems, and individual solutions for clinical research (e.g., databases,  
50 registries) at the same time. In many cases, the interoperability of these systems is limited (9).  
51 Thus, a major concern for the effective usage of clinical data even within one system is the often-  
52 fragmented data storage creating so called “data silos” (10, 11).

53 First developed for the industry, data warehousing has been identified as a solution to overcome  
54 this siloed infrastructure (11). Clinical data warehouses (CDW), more specifically, consolidate and  
55 integrate clinical data from various sources, such as health care data (e.g., from EHR), medical  
56 research data (e.g., from research biobanks or clinical trials) and patient-generated data (e.g., via  
57 mobile phones, smart-health applications, or wearables) (12). When fully implemented, CDW  
58 allow for a broad and real-time analysis of data at the levels of individual patients and cohorts.  
59 The vast amount of data provided by CDW is thus seen as a key resource for data-intensive  
60 approaches such as research in precision medicine and quality improvement (12-15).

61 However, CDW are more than a mere technical infrastructure to integrate data. CDW hold  
62 responsibility over data stewardship (16), meaning the management and oversight of data, playing  
63 a crucial role in making stored clinical data accessible and (re)usable. With the multiplying  
64 promises of data-intensive research, the governance of data access and use gains an ethical  
65 dimension whose relevance is debated internationally (4, 17, 18).

66 An abundance of policies, regulations and guidelines addresses the importance of sharing data  
67 and making health data accessible for research purposes, thus calling for a transparent and  
68 sustainable data access governance (19). For instance, the World Medical Association (WMA) in

69 their Declaration of Taipei clearly demands, "Governance arrangements must include (...) criteria  
70 and procedures concerning the access to and the sharing of health data" (20).

71 Challenges often arise when ethical standards are implemented in practice. In the case of  
72 biobanks, for instance, a recent investigation on sample and data access governance revealed  
73 significant shortcomings: although sample and data access policies are required, their availability  
74 is limited and the criteria for access decisions outlined in the policies lack systematization and  
75 harmonization (21). This is recognized as a threat to responsible and transparent (inter-)national  
76 collaboration and thus limits the prospects of networked biobanking (22).

77 Regarding data governance and stewardship, biobanks and CDW share common responsibilities.  
78 So far, the scientific literature offers little information about the actual practice of structuring and  
79 handling the governance of data access in CDW. A review by Holmes et al. on data warehouse  
80 governance for distributed research networks found that details on governance were sparse.  
81 However, their review was limited to publications from the U.S. before July 2013, and the authors  
82 expected more fitting publications to emerge in the years following their publication (23).

83 The aim of this study was to assess the spectrum of criteria and procedures applied in data access  
84 and use governance in CDW internationally.

## 85 **METHODS**

86 We performed a systematic review of (a) published scientific literature on CDW and (b) publicly  
87 available information on CDW data access. A protocol for this review was prepared using the  
88 PRISMA-P 2015 Checklist (24) and was preregistered and published within the Open Science  
89 Framework (25). The methods of this study are presented in accordance with the Preferred  
90 Reporting Items for Systematic Reviews and Meta-Analyses (PRISMA) Statement where  
91 applicable (26).

## 92 **Search and selection**

93 First, to review the scientific literature, the search engines PubMed, Web of Science, ACM Digital  
94 Library, CINAHL and IEEE Xplore were queried systematically. The PRESS checklist served to  
95 ensure the inclusion of essential elements in the search strategy (27). The search terms were  
96 developed iteratively by piloting combinations of key words and MeSH terms in PubMed and the  
97 results were assessed for the inclusion of known representative literature. This process resulted  
98 in the combination of key words and MeSH terms of the search strategy presented in table 1. The  
99 piloting was performed in October 2018, and the final search was conducted in November 2018.

100 The retrieved scientific literature was imported into Endnote (Version X9.1) and screened for  
101 eligibility using RAYYAN (28). Two authors (EP, HL) independently screened all records and  
102 checked for eligibility and inclusion. In order to be included, scientific literature needed to explicitly  
103 report the development, implementation or maintenance of a CDW and provide information on the  
104 governance of data access and use. Further inclusion criteria were the language of the publication  
105 (English, German, or French) and the type of CDW. Only publications that described large-scale  
106 CDW (e.g., academic medical centers, larger hospitals) that process data collected from routine  
107 health care, and disease-general CDW (not, for example, CDW specific to diabetes) were  
108 included. We did not set any restriction based on the date of publication of the source.

109 After screening the first 100 references, we compared the initial results and discussed the  
110 appropriateness of the inclusion and exclusion criteria. In screening the full body of literature, 42  
111 conflicting ratings occurred, all of which were resolved by discussion.

112 In addition, the search engine Google Scholar was consulted using the key search term elaborated  
113 in table 1. The first 200 hits sorted by relevance were included. Finally, in a reference check, the  
114 references of all included publications were screened to check for additional literature that had not  
115 been captured by our search strategy.

116 Second, for the publicly available information, a web search was conducted via Google.de to  
117 identify the online presence of CDW. The first 100 hits sorted by relevance (by default) were  
118 screened for CDW websites (see table 1). There, we searched for publicly available information  
119 on data access governance, such as linked access policy documents or access and use criteria  
120 addressed directly on the web pages. Further, we searched specifically for the web presences of  
121 the CDW of the included literature to check for online available policies.

122 In addition, Google.de was separately searched for “access policies” (see table 1). All web  
123 searches were performed using Google.de in a private browsing mode of the Mozilla Firefox web  
124 browser, with all cookies deleted and all private accounts logged out of prior to the search.

## 125 **Analysis and synthesis**

126 A qualitative thematic analysis was applied to all included literature (29). Three main thematic  
127 categories were developed through an inductive strategy. The main categories were then applied  
128 to the literature, and the relevant text passages were coded using MAXQDA 2018 (30). We  
129 sensitively extracted all the information potentially relevant to data access and use governance.  
130 The findings were then clustered into a matrix containing the spectrum of thematic categories and  
131 subcategories derived from the literature. As this review did not focus on the results of  
132 interventions, we did not anticipate the need for methods to minimize the risk of bias.

## 133 **RESULTS**

134 The systematic scientific literature search retrieved a total of 4249 references. After duplicates  
135 were removed, 4133 references were screened. Fifty-one references were then included in the  
136 full-text screening, 19 of which fulfilled the criteria and were included in the final analysis. Four  
137 additional publications were included via the Google Scholar searches. With the additional web  
138 search strategy applied in this study, we found 14 CDW web pages, none of which contained

139 publicly available information on data access governance, such as linked access policy documents  
140 or access and use criteria (see supplement table 1 for a list of the CDW web pages). We found  
141 one access policy that outlined the governance arrangements of CDWs and fulfilled our inclusion  
142 criteria, as determined by checking the web pages of the 23 CDWs of the publications included in  
143 the study. The reference check of all included publications did not yield additional literature or  
144 documents. (11, 14, 15, 31-50). One intermediate outcome of our study is therefore that only one  
145 out of 37 CDW (14 in website search, 27 from scientific literature) had a policy retrievable from  
146 their website.

147 A final set of 24 documents (23 publications and one access policy) was included for the qualitative  
148 thematic analysis. See the PRISMA flow diagram in figure 1 for details. All included publications  
149 were in English. Twenty-two publications were published in peer-reviewed journals, and one was  
150 included in conference proceedings. See supplement table 2 for details on all included documents.

151 The primary outcome of this systematic review is a matrix containing the qualitative spectrum of  
152 criteria and procedures applied in data access and use governance in CDW (see table 2). The  
153 matrix is divided into three main categories: (1) requirements, including the subcategories  
154 recipient, reuse and formal requirements, (2) structures and procedures, including the  
155 subcategories review bodies and values, and (3) access, including the subcategory access  
156 limitations.

157 All six subcategories are further split into more detailed subcategories addressing particular  
158 aspects relating to data access and use. See table 2 for the full set of categories and  
159 subcategories. An expanded table giving exemplary quotes from the included literature for all  
160 subcategories is available as an online supplement (supplement table 3).

161 The policy retrieved contributed substantially to our results (51). What stood out was the clarity of  
162 definitions and terms in the document. However, while providing a detailed list for a data reuse



163 “application”, it does not expand on what will ultimately be decisive for a data access and use  
164 decision: “(...) compliance with such other criteria as the Research Committee deems appropriate  
165 for the Research in question and the protection of Healthix.” (p.23) and “If deemed feasible, the  
166 application will then be presented to the Research Committee for review and final action, and such  
167 final action shall be communicated in writing to the requesting Researcher.” (p.25) (51). In  
168 contrast, the scientific literature was lacking uniformity in terminology and precision overall. It also  
169 rarely provided clear indication of whether a certain aspect directly contributes to a data access  
170 and use decision.

171 In the following, we present a brief definition of the themes to facilitate the understanding of the  
172 matrix. Figure 2 serves as an overview illustrating the relationship between requirements,  
173 structures and procedures, and access.

## 174 **1. Requirements**

175 Under the main category “requirements”, we subsume all prerequisites linked to the data request.  
176 We distinguish between the requirements relating to the potential data recipient (recipient  
177 requirements), the requirements relating to the data reuse (reuse requirements) and the  
178 requirements relating to documents, policies or other formalities (formal requirements).

### 179 ***1.1 Recipient requirements***

180 The recipient requirements include various definitions of potential data recipients, organized by  
181 their formal categorization, their background, their qualifications or their relation to the CDW.

182 *Recipient categorization:* Recipients can be categorized in different manners. On a general level,  
183 these categories can be divided into roles and status. Role represents a specific combination of  
184 attributes defined in detail by the respective CDW (e.g. background and qualifications combined).

185 Status describes the presence or lack of one concrete attribute (e. g. authorized or not, internal or  
186 not).

187 *Recipient background:* On a more detailed level, potential data recipients are characterized by  
188 their background. This can be a specific professional background or another background relevant  
189 to the context of the CDW.

190 *Recipient qualifications:* Potential data recipients can be required to have certain qualifications in  
191 order to access the data, meaning that they have skills that enable them to use the data as  
192 required by the CDW.

193 *Recipient relation to CDW:* The potential data recipient's relationship to the CDW might play a role  
194 in the data request. Some CDW might only agree to data access when a prior relation to the CDW  
195 or to the data provided to the CDW has been established.

## 196 **1.2 Reuse requirements**

197 The reuse requirements reflect different aspects of the planned data reuse that might influence  
198 access and use decisions.

199 *Reuse purposes:* Reuses can be described by their intended purpose, meaning the proposed  
200 objective of the data reuse. We intentionally excluded primary uses such as treatment and the  
201 closely related purposes of payment and insurance coverage review as presented in the policy  
202 document (51), as this review focuses on data reuse.

203 *Reuse setup:* Reuse setup describes organizational and practical level preparations for the data  
204 reuse that need to be provided for a data request.

205 *Reuse risk mitigation:* Reuse risk mitigation describes the potentially required commitments of the  
206 data reuser that serve to minimize the risk to the data subject stemming from the reuse of data.

207 *Reuse values*: Reuse values are requirements to the quality and integrity of the reuse request  
208 concerning ethical or scientific soundness, or appropriateness. *Ethical soundness* can be further  
209 subdivided into responsibility, patient-centricity and non-competitiveness.

### 210 **1.3 Formal requirements**

211 Formal requirements are documents, policies and regulations which potential data recipients  
212 might need to sign, respect or agree to for a positive data access and use decision.

213 *Data reuse documents*: Data reuse documents describe mutual agreements and contracts specific  
214 to the reuse of the data.

215 *General policies and regulations*: This section describes fundamental laws and policies whose  
216 requirements are not specific to the CDW but more general.

217 *Local policies and regulations*: In contrast to the general policies and regulations, this subcategory  
218 comprises the policies and regulations where the content would be expected to vary strongly  
219 depending on the local particularities.

220 *Fees*: The data access and use decisions might also rely on the potential recipient's agreement  
221 to paying a fee.

## 222 **2. Structure and procedures**

223 Under the main category "structure and procedures", the governance structures and procedures  
224 are subsumed which need to be in place to provide for a review of the data request and the  
225 subsequent data access and use decision. They are divided into review bodies who are exercising  
226 the review, and review values underlying review procedures and decisions.

### 227 **2.1 Review bodies**

228 Review bodies reflect the implementation of designated governance bodies, which is  
229 commonplace in all assessed CDW. Here, we do not distinguish between boards, groups and  
230 individual positions, as the hierarchies and directions are not always transparent.

231 *Governance bodies:* This section comprises a variety of rather general governance bodies  
232 involved in the data reuse review.

233 *Scientific review bodies:* As a more specialized review body type, scientific review bodies describe  
234 those dealing with research questions.

235 *Patient review bodies:* Another type of specific review bodies are those where patients are  
236 involved in data access and use decisions.

## 237 **2.2 Review values**

238 Review bodies might follow certain review values when deciding data access and use requests  
239 which are subsumed in the following.

240 *General values:* General values describe values driving the CDW's overall data access  
241 governance structure and procedures.

242 *Reducing bias:* This section encompasses the measures taken to reduce bias in the data request  
243 review.

244 *Reducing investment:* Reducing investments reflects aspects that save valuable resources, such  
245 as time and effort.

246 *Managing competitiveness:* Managing competitiveness describes an approach that places  
247 common interest over individual interest.

248 **3. Access**

249 Under the main category “access”, we subsume data access which can be granted with varying  
250 limitations based on the previously described requirements or particularities of the CDW.

251 **3.1 Access limitations**

252 Access limitations can take on different forms and restrict either data itself, location or the access  
253 time.

254 *Limited data:* Data access can also be limited in itself, if only a specific part of the requested data  
255 is provided, or if it is only provided in a specific form that might be reduced in information.

256 *Limited location:* Another possible limitation in access can be the location, where data can only be  
257 accessed from specific places.

258 *Limited time:* Some CDW might restrict the access to data to a certain timeframe or number of  
259 accesses.

260 **DISCUSSION**

261 This systematic review aimed to assess the spectrum of criteria and procedures that surround  
262 data access and use decisions in CDW. A core finding is the lack of concrete information available  
263 in the scientific literature and the lacking public accessibility of CDW data access policies.

264 **Focus of the current scientific discussion**

265 While there is a solid corpus of scientific literature on the implementation and maintenance of  
266 CDW, the governance of data access is only marginally addressed. In many cases, the  
267 publications retrieved mention the relevance of data access and use without clarifying the details

268 on the handling in practice. Many of the publications instead focus on technical aspects of data  
269 governance. Since the practical aspects of data access and use only become relevant when a  
270 significant amount of data is available for sharing, it is reasonable that CDW might approach  
271 technical issues first, which also require considerable effort and resources.

272 However, international recommendations on the ethics of health data sharing also emphasize the  
273 importance of procedural (e.g. independent review) and substantial aspects (e.g. criteria for data  
274 access decisions) of data access governance (20, 52). The design and implementation of such  
275 sound governance arrangements for data access and use are nonetheless challenging (53).

276 Procedural aspects might be comparatively straightforward. Despite the heterogeneity of the  
277 denominations and of the composition of governance bodies, based on our study such procedural  
278 aspects seem to be addressed appropriately in the scientific literature.

279 Substantial aspects can be considered more demanding. The elaboration of concise access  
280 criteria satisfying all stakeholders and enabling all foreseen data reuses is a highly complex task.  
281 Considering the amount of public funding invested in the establishment of CDW, sharing details  
282 on the conceptualization and the access and use criteria themselves with the scientific community  
283 and the public is all the more important. This could significantly improve the efficiency of funding  
284 devoted to CDW.

### 285 **Accessibility of policies, and access and use criteria**

286 In publications on transparent access and use governance, we would expect to find concrete and  
287 decisive criteria on the basis of which data access requests are weighted and judged. While the  
288 existence of more concrete policies is mentioned in the publications included, they could not be  
289 retrieved in our separate search except for one.

290 In the additional web search for publicly available access and use policy documents, our strategy  
291 was reduced to simpler search terms (see table 1). A more refined search string could have  
292 potentially produced more policy documents. While this can be considered a limitation of our study,  
293 it also emulates how researchers and the public would most likely search for information on CDW.

294 To our knowledge, other than for biobanks (54) there are no public registries for CDW that would  
295 help access such information. It therefore appears that the access to those policies is limited, both  
296 by the CDW themselves and through a lack of appropriate search instruments. This is an important  
297 finding, as it reveals significant shortcomings in the compliance of CDW with the internationally  
298 agreed upon and accepted ethical standards of transparency, as required, for instance, by the  
299 WMA (20).

### 300 **Transparency of criteria and its ethical value**

301 Through our screening, we were able to extract potential criteria for decisions on data access and  
302 use. However, most of these criteria were not explicitly described as being decisive for a data  
303 request. Criteria applicable to the handling of data access requests are often provided in a rather  
304 unspecific and unstructured manner. They are not addressed in a separate designated section of  
305 the publications but are mentioned secondarily or need to be deduced from other information.  
306 Even the more explicit access and use criteria offer considerable leeway for interpretation and are  
307 therefore difficult to translate into practice. In addition, the denomination of requirements,  
308 structures and procedures varies highly between CDW and often lacks a more distinct definition.  
309 This can be detrimental to the harmonization and effectiveness of the CDW's objectives.

310 The need for more clarity and standards on conditions for access and use must also be considered  
311 an ethical issue. While information transparency is not an ethical principle on its own, it can  
312 certainly become ethically relevant, for example when ethical principles such as informed consent  
313 or accountability depend on that information (55).

314 One could argue that individuals consenting to their data being stored and processed by a CDW  
315 rely on the CDW's governance structures to execute the data reuse, first, according to their given  
316 consent, and second, with their best interests in mind beyond the consent. In their publication on  
317 the governance of biobanks, the German Ethics Council states that in order to compensate for the  
318 lack of precision at the time of consenting, donors should have the capacity to trace the  
319 governance of sample and data transfer. The specific purposes of reuse should therefore be  
320 publicly accessible in "a clear, generally intelligible and up-to-date account" (p.44) (56). This  
321 should be considered analogous for CDW. Transparency can therefore be considered a means to  
322 involve the data subjects and to give them a higher degree of data control. While some CDW  
323 embrace the direct involvement of patients in governance processes, for example in patient-led  
324 oversight committees, such measures are likely to improve transparency on a more individual  
325 level.

326 Particularly important, moreover, is the role of transparency as a requirement for setting up  
327 accountability mechanisms. Only clear conditions and attributions allow for the evaluation and  
328 execution of compliance with ethical and other norms. Ultimately, accountability also serves to  
329 increase public trust in data reuse (19).

330 Increased trust in CDW is also likely to have a positive effect on the future willingness to share  
331 data (57). In contrast, the limited availability of information in the scientific literature and on CDW  
332 websites might prove to be detrimental. On a larger scale, this could weaken the potential of LHCS  
333 and other promising outcomes of secondary uses of data, such as precision medicine or  
334 comparative effectiveness studies, as they rely on the public's investment in research.

### 335 **Return on public investment**

336 Expectations placed on data-driven approaches in biomedical research and health care are high.  
337 Accordingly, increased efforts are being made internationally to develop and implement IT



338 infrastructures that facilitate high-quality data access and use. In Germany, for instance, the  
339 Medical Informatics Initiative funding scheme was launched by the Federal Ministry of Research  
340 and Education (BMBF) in 2016 and aims to foster collaborative data use by investing 150 million  
341 Euros into the development of robust IT solutions (58).

342 This considerable allocation of funding, however, is generally based on the assumption of a return  
343 on public investment. Normative concepts and recommendations for the ethical conduct of data-  
344 driven approaches in medical research and health care have been developed and almost  
345 unanimously highlight the importance of data access (20, 59-61). However, with an increasing  
346 amount of data requests for data-driven approaches, the case-by-case decisions as they appear  
347 to be reflected by our study will need to be replaced by a more automatized approach. In order to  
348 implement such automatization, the criteria and their weighting must be unambiguously clear.

349 Both, promoting scientific research and improving health care delivery, are very much in the public  
350 interest. While the public is supportive of the reuse of data for research purposes [35], it is the  
351 transparency of data access and use governance that might ensure their long-term support and  
352 trust through efficient reuse, informed consent, and accountability.

## 353 **CONCLUSION**

354 The results of this review may contribute to the development of practice-oriented minimal  
355 standards for the governance of data access and use, which could also contribute to more  
356 harmonization, efficiency, and effectiveness.

357 The study can further serve as an indicator for the practical implementation of (soft) regulations  
358 and statements of intent for data access. It may inform researchers and physicians, funders, and  
359 hospital administration staff involved in the design and implementation of CDW policies on data  
360 access and use. In the long run, more emphasis should be placed on the practice evaluation of

361 CDW governance to assess compliance with ethical standards and to identify practical issues  
362 (62). The latter, in turn, will be relevant for further policy development.

363 As digitalization and data-driven approaches in health research and health care are rapidly  
364 evolving, the current governance practices will require broader implementation, evaluation, and  
365 improvement to keep up with ongoing developments and challenges.

366

## 367 **LIST OF ABBREVIATIONS**

368 BMBF - German Federal Ministry of Education and Research

369 CDW - Clinical data warehouse

370 EHR - Electronic health records

371 LHCS - Learning health care systems

372 PRISMA - Preferred Reporting Items for Systematic Reviews and Meta-Analyses

373 WMA - World Medical Association

374

## 375 **DECLARATIONS**

### 376 **Ethics approval and consent to participate**

377 Not applicable.

378

### 379 **Consent for publication**

380 Not applicable.

381

### 382 **Availability of data and materials**

383 An extensive part of the data analyzed during this study is included in this published article and  
384 its supplementary files (Supplement Table 3). The raw dataset analyzed during the current study  
385 is not publicly available in full due to copyright restrictions but is available from the  
386 corresponding author on reasonable request.

387

### 388 **Competing interests**

389 All authors have completed the ICMJE uniform disclosure form at  
390 [www.icmje.org/coi\\_disclosure.pdf](http://www.icmje.org/coi_disclosure.pdf) and declare: all authors had financial support from HiGHmed,  
391 Medical Informatics Consortium, for the submitted work; no financial relationships with any  
392 organizations that might have an interest in the submitted work in the previous three years; no  
393 other relationships or activities that could appear to have influenced the submitted work.

### 394 **Funding**

395 This study was funded by the German Federal Ministry of Education and Research (BMBF;  
396 HiGHmed, Medical Informatics Consortium, Medizinische Hochschule Hannover, 01ZZ1802C).

### 397 **Authors' contributions**

398 DS and HL conceived the work. HL and EP contributed to the design, the acquisition, the analysis,  
399 and the interpretation of the data, as well as the draft and revision of the work. All three authors  
400 consented on the final version of the paper.

### 401 **Acknowledgments**

402 We thank Delwen Franzen for her helpful comments on our draft.

403

## REFERENCES

1. Adler-Milstein J, DesRoches CM, Kralovec P, Foster G, Worzala C, Charles D, et al. Electronic health record adoption in US hospitals: progress continues, but challenges persist. *Health affairs*. 2015;34(12):2174-80.
2. Longhurst CA, Harrington RA, Shah NH. A 'green button' for using aggregate patient data at the point of care. *Health affairs (Project Hope)*. 2014;33(7):1229-35.
3. Meystre SM, Lovis C, Burkle T, Tognola G, Budrionis A, Lehmann CU. Clinical Data Reuse or Secondary Use: Current Status and Potential Future Progress. *Yearbook of medical informatics*. 2017;26(1):38-52.
4. Diamond CC, Mostashari F, Shirky C. Collecting and sharing data for population health: a new paradigm. *Health affairs (Project Hope)*. 2009;28(2):454-66.
5. Friedman CP, Wong AK, Blumenthal D. Achieving a nationwide learning health system. *Science translational medicine*. 2010;2(57):57cm29.
6. Jensen PB, Jensen LJ, Brunak S. Mining electronic health records: towards better research applications and clinical care. *Nature Reviews Genetics*. 2012;13:395.
7. Emanuel EJ, Wachter RM. Artificial Intelligence in Health Care: Will the Value Match the Hype? *Jama*. 2019.
8. Khoubati K, Themistocleous M. Integrating the IT infrastructures in healthcare organisations: a proposition of influential factors. *The Electronic Journal of e-Government*. 2006;4(1):27-36.
9. Dixon BE, Vreeman DJ, Grannis SJ. The long road to semantic interoperability in support of public health: experiences from two states. *J Biomed Inform*. 2014;49:3-8.
10. Schneeweiss S. Learning from Big Health Care Data. 2014;370(23):2161-3.
11. Chute CG, Beck SA, Fisk TB, Mohr DN. The Enterprise Data Trust at Mayo Clinic: a semantically integrated warehouse of biomedical data. *J Am Med Inform Assoc*. 2010;17(2):131-5.
12. Shin S-Y, Kim WS, Lee J-H. Characteristics desired in clinical data warehouse for biomedical research. *Healthcare informatics research*. 2014;20(2):109-16.
13. Evans RS, Lloyd JF, Pierce LA. Clinical use of an enterprise data warehouse. *AMIA Annual Symposium proceedings AMIA Symposium*. 2012;2012:189-98.
14. Foran DJ, Chen W, Chu H, Sadimin E, Loh D, Riedlinger G, et al. Roadmap to a Comprehensive Clinical Data Warehouse for Precision Medicine Applications in Oncology. *Cancer informatics*. 2017;16:1176935117694349.
15. Horvath MM, Winfield S, Evans S, Slopek S, Shang H, Ferranti J. The DEDUCE Guided Query tool: Providing simplified access to clinical data for research and quality improvement. *Journal of Biomedical Informatics*. 2011;44(2):266-76.
16. Rosenbaum S. Data governance and stewardship: designing data stewardship entities and advancing data access. *Health services research*. 2010;45(5 Pt 2):1442-55.
17. Ford E, Boyd A, Bowles JK, Havard A, Aldridge RW, Curcin V, et al. Our data, our society, our health: A vision for inclusive and transparent health data science in the United Kingdom and beyond. *Learning Health Systems*. 2019:e10191.
18. Vayena E, Dzenowagis J, Brownstein JS, Sheikh A. Policy implications of big data in the health sector. *Bulletin of the World Health Organization*. 2018;96(1):66.
19. Blasimme A, Fadda M, Schneider M, Vayena E. Data Sharing For Precision Medicine: Policy Lessons And Future Directions. *Health affairs (Project Hope)*. 2018;37(5):702-9.
20. World Medical Association. WMA declaration of Taipei on ethical considerations regarding health databases and biobanks. WMA; 2016.

21. Langhof H, Kahrass H, Sievers S, Strech D. Access policies in biobank research: what criteria do they include and how publicly available are they? A cross-sectional study. *European journal of human genetics : EJHG*. 2017;25(3):293-300.
22. Langhof H, Kahrass H, Illig T, Jahns R, Strech D. Current practices for access, compensation, and prioritization in biobanks. Results from an interview study. *European journal of human genetics : EJHG*. 2018;26(11):1572-81.
23. Holmes JH, Elliott TE, Brown JS, Raebel MA, Davidson A, Nelson AF, et al. Clinical research data warehouse governance for distributed research networks in the USA: a systematic review of the literature. *Journal of the American Medical Informatics Association : JAMIA*. 2014;21(4):730-6.
24. Moher D, Shamseer L, Clarke M, Ghersi D, Liberati A, Petticrew M, et al. Preferred reporting items for systematic review and meta-analysis protocols (PRISMA-P) 2015 statement. 2015;4(1):1.
25. Governance of Data Sharing. [Internet]. Open Science Framework 2018. Available from: <https://osf.io/6w4n5/>.
26. Moher D, Liberati A, Tetzlaff J, Altman DG/Aoim. Preferred reporting items for systematic reviews and meta-analyses: the PRISMA statement. 2009;151(4):264-9.
27. McGowan J, Sampson M, Salzwedel DM, Cogo E, Foerster V, Lefebvre C. PRESS Peer Review of Electronic Search Strategies: 2015 Guideline Statement. *Journal of clinical epidemiology*. 2016;75:40-6.
28. Ouzzani M, Hammady H, Fedorowicz Z, Elmagarmid A. Rayyan-a web and mobile app for systematic reviews. *Systematic reviews*. 2016;5(1):210.
29. Braun V, Clarke VJ/Qrip. Using thematic analysis in psychology. 2006;3(2):77-101.
30. VERBI Software GmbH. MAXQDA, Software for qualitative data analysis Berlin, Germany: VERBI Software Consult Sozialforschung GmbH; [Available from: <http://www.maxqda.com/products/maxqda>].
31. Bouzillé G, Westerlynck R, Defossez G, Bouslimi D, Bayat S, Riou C, et al. Sharing health big data for research-A design by use cases: the INSHARE platform approach. *Stud Health Technol Inform*. 2017(245):303 - 7.
32. Des Jardins TR. The keys to governance and stakeholder engagement: the southeast michigan beacon community case study. *EGEMS (Washington, DC)*. 2014;2(3):1068.
33. Fleischman W, Lowry T, Shapiro J. The visit-data warehouse: enabling novel secondary use of health information exchange data. *EGEMS (Washington, DC)*. 2014;2(1):1099.
34. Ford DV, Jones KH, Verplancke JP, Lyons RA, John G, Brown G, et al. The SAIL Databank: building a national architecture for e-health research and evaluation. *BMC health services research*. 2009;9:157.
35. Grant A, Moshyk A, Diab H, Caron P, de Lorenzi F, Bisson G, et al. Integrating feedback from a clinical data warehouse into practice organisation. *International journal of medical informatics*. 2006;75(3-4):232-9.
36. Haarbrandt B, Schreiweis B, Rey S, Sax U, Scheithauer S, Rienhoff O, et al. HiGHmed - An Open Platform Approach to Enhance Care and Research across Institutional Boundaries. *Methods Inf Med*. 2018;57(S 01):e66-e81.
37. Hazlehurst BL, Kurtz SE, Masica A, Stevens VJ, McBurnie MA, Puro JE, et al. CER Hub: An informatics platform for conducting comparative effectiveness research using multi-institutional, heterogeneous, electronic clinical data. *International journal of medical informatics*. 2015;84(10):763-73.
38. Jannot AS, Zapletal E, Avillach P, Mamzer MF, Burgun A, Degoulet P. The Georges Pompidou University Hospital Clinical Data Warehouse: A 8-years follow-up experience. *International journal of medical informatics*. 2017;102:21-8.
39. Laws R, Gillespie S, Puro J, Van Rompaey S, Quach T, Carroll J, et al. The Community Health Applied Research Network (CHARN) Data Warehouse: a Resource for Patient-Centered Outcomes Research and Quality Improvement in Underserved, Safety Net Populations. *EGEMS (Washington, DC)*. 2014;2(3):1097.
40. Lowe HJ, Ferris TA, Hernandez PM, Weber SC. STRIDE--An integrated standards-based translational research informatics platform. *AMIA Annu Symp Proc*. 2009;2009:391-5.

41. Liu J, Erdal S, Silvey SA, Ding J, Riedel JD, Marsh CB, et al. Toward a fully de-identified biomedical information warehouse. *AMIA Annu Symp Proc.* 2009;2009:370-4.
42. Perera G, Broadbent M, Callard F, Chang CK, Downs J, Dutta R, et al. Cohort profile of the South London and Maudsley NHS Foundation Trust Biomedical Research Centre (SLaM BRC) Case Register: current status and recent enhancement of an Electronic Mental Health Record-derived data resource. *BMJ open.* 2016;6(3):e008721.
43. Prasser F, Kohlbacher O, Mansmann U, Bauer B, Kuhn KA. Data Integration for Future Medicine (DIFUTURE). *Methods Inf Med.* 2018;57(S 01):e57-e65.
44. Prokosch HU, Acker T, Bernarding J, Binder H, Boeker M, Boerries M, et al. MIRACUM: Medical Informatics in Research and Care in University Medicine. *Methods Inf Med.* 2018;57(S 01):e82-e91.
45. Ross TR, Ng D, Brown JS, Pardee R, Hornbrook MC, Hart G, et al. The HMO Research Network Virtual Data Warehouse: A Public Data Model to Support Collaboration. *EGEMS (Washington, DC).* 2014;2(1):1049.
46. Stark PC, Kalenderian E, White JM, Walji MF, Stewart DC, Kimmes N, et al. Consortium for oral health-related informatics: improving dental research, education, and treatment. *Journal of dental education.* 2010;74(10):1051-65.
47. Turley CB, Obeid J, Larsen R, Fryar KM, Lenert L, Bjorn A, et al. Leveraging a Statewide Clinical Data Warehouse to Expand Boundaries of the Learning Health System. *EGEMS (Washington, DC).* 2016;4(1):1245.
48. Van Eaton EG, Devlin AB, Devine EB, Flum DR, Tarczy-Hornoch P. Achieving and sustaining automated health data linkages for learning systems: barriers and solutions. *EGEMS (Washington, DC).* 2014;2(2):1069.
49. Walji MF, Kalenderian E, Stark PC, White JM, Kookal KK, Phan D, et al. BigMouth: a multi-institutional dental data repository. *J Am Med Inform Assoc.* 2014;21(6):1136-40.
50. Winter A, Staubert S, Ammon D, Aiche S, Beyan O, Bischoff V, et al. Smart Medical Information Technology for Healthcare (SMITH). *Methods Inf Med.* 2018;57(S 01):e92-e105.
51. Healthix. Healthix: Security Policies and Procedures 2019 [Available from: <https://healthix.org/who-we-are/healthix-policies/>].
52. Council of Europe. Recommendation CM/Rec(2016)6 of the Committee of Ministers to member States on research on biological materials of human origin 2016 [Available from: [https://search.coe.int/cm/Pages/result\\_details.aspx?ObjectId=090000168064e8ff](https://search.coe.int/cm/Pages/result_details.aspx?ObjectId=090000168064e8ff)].
53. Ohno-Machado L. To share or not to share: that is not the question. *Science translational medicine.* 2012;4(165):165cm15-cm15.
54. Holub P, Swertz M, Reihs R, van Enckevort D, Müller H, Litton J-E. BBMRI-ERIC directory: 515 biobanks with over 60 million biological samples. *Biopreservation and biobanking.* 2016;14(6):559-62.
55. Turilli M, Floridi L. The ethics of information transparency. *Ethics and Information Technology.* 2009;11(2):105-12.
56. Ethikrat N. Human biobanks for research. Berlin: The German National Ethics Council. 2010.
57. Vayena E, Blasimme A. Biomedical Big Data: New Models of Control Over Access, Use and Governance. *Journal of bioethical inquiry.* 2017;14(4):501-13.
58. Gehring S, Eulenfeld R. German Medical Informatics Initiative: Unlocking data for research and health care. *Methods of information in medicine.* 2018;57(S 01):e46-e9.
59. OECD. Recommendation of the OECD Council on Health Data Governance 2017 [Available from: <https://www.oecd.org/health/health-systems/Recommendation-of-OECD-Council-on-Health-Data-Governance-Booklet.pdf>].
60. Nuffield Council on Bioethics. The Collection, Linking and Use of Data in Biomedical Research and Health Care: Ethical Issues: Nuffield Council on Bioethics; 2015.
61. Deutscher Ethikrat. Big Data und Gesundheit—Datensouveränität als informationelle Freiheitsgestaltung. 2017.

62. Langhof H, Schwietering J, Strech D. Practice evaluation of biobank ethics and governance: current needs and future perspectives. *Journal of medical genetics*. 2018.

## FIGURES

Figure 1 Systematic search flow diagram based on PRISMA

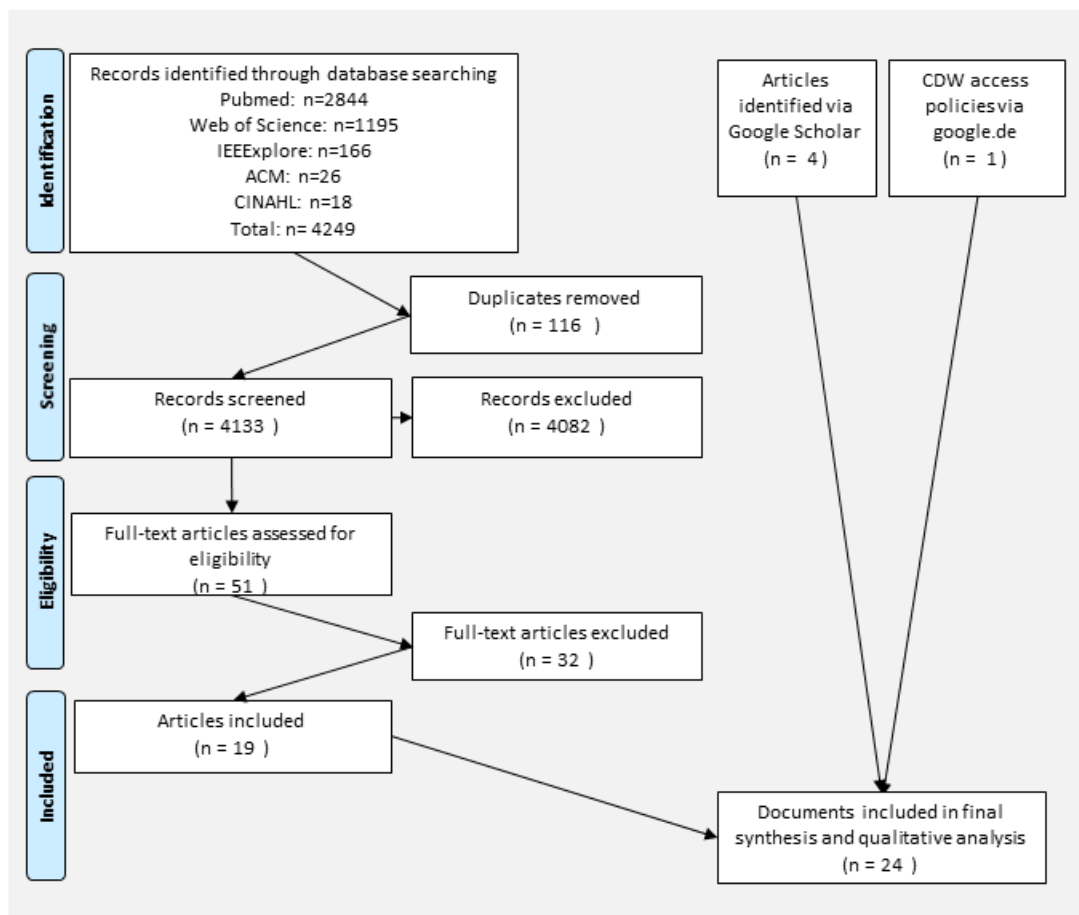



Figure 2 Data access review: Overview of the main categories and two subcategory levels

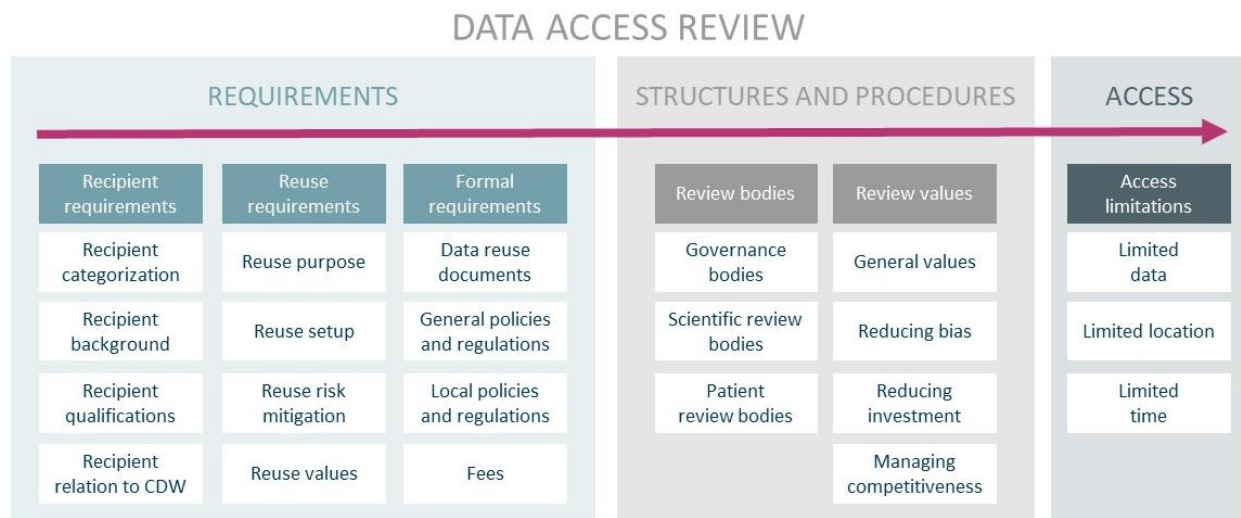

## TABLES

Table 2 Search strategy

| DATABASE                               | SEARCH TERM COMBINATION                                                                                                                                                                                                                                         |
|----------------------------------------|-----------------------------------------------------------------------------------------------------------------------------------------------------------------------------------------------------------------------------------------------------------------|
| <b>PUBLISHED SCIENTIFIC LITERATURE</b> |                                                                                                                                                                                                                                                                 |
| PubMed                                 | ((((((((warehouse[Title/Abstract]) OR data warehousing[MeSH Terms]) OR "data warehouse") OR "data integration") OR "data repository") OR "Medical Informatics Applications"[Mesh]) OR Medical Record Linkage"[Mesh])) AND ((ethics[MeSH Terms]) OR governance)) |
| Web of Science                         | TS=(clinical data warehouse OR clinical data repository OR data integration) AND TS=(ethics OR governance)                                                                                                                                                      |
| ACM Digital Library                    | content.ftsec:(+"clinical data warehouse")                                                                                                                                                                                                                      |
| CINAHL                                 | (TX ethics OR TX governance OR SU ethics OR SU governance) AND (TX data warehouse)                                                                                                                                                                              |
| IEEE Xplore                            | ((clinical data warehouse) OR clinical data repository) OR data integration) AND ((ethics) OR governance)                                                                                                                                                       |
| Google Scholar                         | clinical data warehouse                                                                                                                                                                                                                                         |
| <b>PUBLICLY AVAILABLE INFORMATION</b>  |                                                                                                                                                                                                                                                                 |
| Google                                 | clinical data warehouse                                                                                                                                                                                                                                         |
| Google                                 | access policy AND data warehouse AND/OR clinical data                                                                                                                                                                                                           |



Table 2 Qualitative spectrum of criteria and procedures in data use and access governance in CDW

| MAIN CATEGORY                                                  | SUBCATEGORY                     | SUBCATEGORY              | SUBCATEGORY             | SUBCATEGORY                                            |  |
|----------------------------------------------------------------|---------------------------------|--------------------------|-------------------------|--------------------------------------------------------|--|
| <b>REQUIREMENTS</b>                                            | Recipient                       | Recipient categorization | Roles                   |                                                        |  |
|                                                                |                                 |                          | Status                  | Authorized vs. non-authorized<br>Internal vs. external |  |
|                                                                |                                 | Recipient background     | Professional background | Academic staff                                         |  |
|                                                                |                                 |                          |                         | Healthcare professionals                               |  |
|                                                                |                                 |                          |                         | Office staff                                           |  |
|                                                                |                                 | Other background         | Researchers             |                                                        |  |
|                                                                |                                 |                          | Organizations           |                                                        |  |
|                                                                | Patients                        |                          |                         |                                                        |  |
|                                                                | Students                        |                          |                         |                                                        |  |
|                                                                | Recipient qualifications        | Human-subjects training  |                         |                                                        |  |
|                                                                | Recipient relation to CDW       | Affiliation              |                         |                                                        |  |
|                                                                |                                 | Reciprocity              |                         |                                                        |  |
|                                                                | Reuse                           | Reuse purpose            | Research purposes       | General research                                       |  |
|                                                                |                                 |                          |                         | Clinical trials                                        |  |
|                                                                |                                 |                          |                         | Epidemiological studies                                |  |
|                                                                |                                 |                          |                         | Feasibility check for research                         |  |
|                                                                |                                 |                          |                         | Health services research                               |  |
|                                                                |                                 |                          |                         | (Non-)human subject research                           |  |
|                                                                |                                 | Observational studies    |                         |                                                        |  |
|                                                                |                                 | Personalized treatments  |                         |                                                        |  |
|                                                                |                                 | Health care purposes     | Audit                   |                                                        |  |
| Care management                                                |                                 |                          |                         |                                                        |  |
| Clinical care coordination                                     |                                 |                          |                         |                                                        |  |
| Clinical quality improvement                                   |                                 |                          |                         |                                                        |  |
| Facilitating organ, eye or tissue donation and transplantation |                                 |                          |                         |                                                        |  |
| Public health reporting                                        |                                 |                          |                         |                                                        |  |
| Other reuse purposes                                           | Grant application support       |                          |                         |                                                        |  |
|                                                                | Marketing                       |                          |                         |                                                        |  |
| Reuse setup                                                    | Clear documentation provided    |                          |                         |                                                        |  |
|                                                                | Dissemination plan provided     |                          |                         |                                                        |  |
|                                                                | Feasibility assessment provided |                          |                         |                                                        |  |
|                                                                | Funding provided                |                          |                         |                                                        |  |
|                                                                | Process details provided        |                          |                         |                                                        |  |
| Reuse risk mitigation                                          | Data protection                 |                          |                         |                                                        |  |
|                                                                | HIPAA compliance                |                          |                         |                                                        |  |
|                                                                | IRB authorization               |                          |                         |                                                        |  |
|                                                                | No contacting data subjects     |                          |                         |                                                        |  |
|                                                                | No reidentification             |                          |                         |                                                        |  |
| No resharing without approval                                  |                                 |                          |                         |                                                        |  |
| Reuse values                                                   | Ethical soundness               | Responsibleness          | Compliance              |                                                        |  |
|                                                                |                                 |                          | Privacy                 |                                                        |  |
|                                                                |                                 |                          | Responsible reuse       |                                                        |  |
|                                                                | Patient-centricity              | Clinical relevance       |                         |                                                        |  |
|                                                                |                                 | Patients first           |                         |                                                        |  |
|                                                                |                                 | Non-competitiveness      |                         |                                                        |  |
|                                                                | Business issues                 | Collaboration principles |                         |                                                        |  |
|                                                                |                                 | Non-profit               |                         |                                                        |  |
|                                                                |                                 | Scientific soundness     | Good research conduct   |                                                        |  |
|                                                                |                                 | Innovation               |                         |                                                        |  |
|                                                                | Merits                          |                          |                         |                                                        |  |
| Appropriateness                                                | Appropriateness of requests     |                          |                         |                                                        |  |
|                                                                | Appropriateness of results      |                          |                         |                                                        |  |
|                                                                | Mission consistent with CDW     |                          |                         |                                                        |  |

|                                                         |                                  |                                        |                           |
|---------------------------------------------------------|----------------------------------|----------------------------------------|---------------------------|
|                                                         |                                  |                                        | Reputation                |
| Formal requirements                                     | Data reuse documents             | Data access/ sharing/ use agreement    |                           |
|                                                         |                                  | Data collaboration agreement           |                           |
|                                                         |                                  | Ethical agreements                     |                           |
|                                                         |                                  | Honorary/ substantive contract         |                           |
|                                                         |                                  | Participation agreement                |                           |
|                                                         | General policies and regulations | Term license agreement                 |                           |
|                                                         |                                  | Ethics                                 | Consent                   |
|                                                         |                                  |                                        | IRB approval              |
|                                                         |                                  | Laws                                   | General laws              |
|                                                         |                                  |                                        | Specific laws             |
|                                                         | Local policies and regulations   | Other general policies and regulations | FAIR principles           |
|                                                         |                                  |                                        | Statewide policy guidance |
|                                                         |                                  | Information governance                 |                           |
| Data access policies                                    |                                  |                                        |                           |
| Data identifying/ access/ sharing/ publishing protocols |                                  |                                        |                           |
| Data management policies                                |                                  |                                        |                           |
| Privacy/ security policies                              |                                  |                                        |                           |
|                                                         | Protocol review guidelines       |                                        |                           |
|                                                         | Research policy                  |                                        |                           |
|                                                         | SOPs                             |                                        |                           |
|                                                         | Fees                             |                                        |                           |

**STRUCTURES AND PROCEDURES**

|                                  |                             |                                   |  |
|----------------------------------|-----------------------------|-----------------------------------|--|
| Review bodies                    | Governance bodies           | Board of directors                |  |
|                                  |                             | Clinical committee                |  |
|                                  |                             | Department head                   |  |
|                                  |                             | Director of professional services |  |
|                                  |                             | Executive board                   |  |
|                                  |                             | IRB                               |  |
|                                  |                             | Project review committee          |  |
|                                  |                             | Privacy board                     |  |
|                                  |                             | Privacy and security committee    |  |
|                                  |                             | Policy advisory groups            |  |
|                                  |                             | Use and access committee          |  |
|                                  |                             | Working groups                    |  |
|                                  | Scientific review bodies    | Academic staff                    |  |
| Data analysts                    |                             |                                   |  |
| Health information research unit |                             |                                   |  |
| Research committee               |                             |                                   |  |
| Patient review bodies            | Scientific peer-review      |                                   |  |
| Review values                    | General values              | Patient-led oversight committee   |  |
|                                  |                             | Appropriate competency            |  |
|                                  |                             | Fine-grained control              |  |
|                                  | Reducing bias               | Holistic governance               |  |
|                                  |                             | Empirical evaluation              |  |
|                                  |                             | No conflict of interest           |  |
|                                  |                             | Objective review                  |  |
|                                  | Reducing investment         | Transparent review                |  |
|                                  |                             | Effective review                  |  |
|                                  | Managing competitiveness    | Timely review                     |  |
| Collaboration                    |                             |                                   |  |
|                                  | Community before individual |                                   |  |

**ACCESS**

|                    |                  |                        |  |
|--------------------|------------------|------------------------|--|
| Access limitations | Limited data     | Aggregated data set    |  |
|                    |                  | De-identified data set |  |
|                    |                  | Limited data set       |  |
|                    | Limited location | Remote access          |  |
|                    |                  | View only              |  |
|                    |                  | Virtual access         |  |
|                    | Limited time     |                        |  |
